# Supplementary material for: Genomic Characterization of the Titan-like Cell Producing Naganishia tulchinskyi, the First Novel Eukaryote Isolated from the International Space Station
Source: MDPI journal article supplement (doi:10.3390/jof8020165), 2022-02-08
Supplement: s1 [file s1]

# Suppl Figures and Table legends

- **Supplementary Figure S1.** Maximum Likelihood phylogenetic tree, based on ITS regions, showing the phylogenetic relationship of *N. tulchinskyi* with closely related members of *Tremellomyces*. Bootstrap values from 1,000 replications are shown at branch points. Bar, 0.02 substitution per site.
- **Supplementary Figure S2.** Maximum Likelihood phylogenetic tree, based on LSU sequences, showing the phylogenetic relationship of *N. tulchinskyi* with closely related members of *Tremellomyces*. Bootstrap values from 1,000 replications are shown at branch points. Bar, 0.02 substitution per site.
- **Supplementary Figure S3.** Maximum Likelihood phylogenetic tree, based on SSU sequences, showing the phylogenetic relationship of *N. tulchinskyi* with closely related members of *Tremellomyces*. Bootstrap values from 1,000 replications are shown at branch points. Bar, 0.01 substitution per site.
- **Supplementary Figure S4.** Maximum Likelihood phylogenetic tree, based on *cytB* sequences, showing the phylogenetic relationship of *N. tulchinskyi* with closely related members of *Tremellomyces*. Bootstrap values from 1,000 replications are shown at branch points. Bar, 0.05 substitution per site.
- **Supplementary Figure S5.** Maximum Likelihood phylogenetic tree, based on *rpb1* sequences, showing the phylogenetic relationship of *N. tulchinskyi* with closely related members of *Tremellomyces*. Bootstrap values from 1,000 replications are shown at branch points. Bar, 0.10 substitution per site.
- **Supplementary Figure S6.** Maximum Likelihood phylogenetic tree, based on *rpb2* sequences, showing the phylogenetic relationship of *N. tulchinskyi* with closely related members of *Tremellomyces*. Bootstrap values from 1,000 replications are shown at branch points. Bar, 0.10 substitution per site.
- **Supplementary Figure S7.** Maximum Likelihood phylogenetic tree, based on *tef1* sequences, showing the phylogenetic relationship of *N. tulchinskyi* with closely related members of *Tremellomyces*. Bootstrap values from 1,000 replications are shown at branch points. Bar, 0.02 substitution per site.
- **Supplementary Figure S8.** SEM (A-C) and TEM (D-G) micrographs highlighting the unusual  $\mu$ G grown Titan-like cell morphology. Titan-like cells show large concave and convex budding scars (A-C). A daughter cell can be seen budding from the mother yeast cell (black arrow), and appears to be altering the shape of the mother cell's cell wall (B). Budding scars are shown to be peeling off of the yeast surfaces (white arrows) (A-C). This phenomenon is shown in TEM images, designated by white arrows (D-G). SEM scale bars are 10 $\mu$ m. TEM scale bars are 5 $\mu$ m (D), 1 $\mu$ m (E-F), and 0.5 $\mu$ m (G). The letter "N" distinguishes the nucleus (B,C, and E).
- **Supplementary Table S1.** Reducing all protein-coding gene products from the predicted proteome of the novel type strain IF6SW-B1<sup>T</sup> to their most distinct Gene Ontology (GO) terms for Biological Process, Cellular Component, and Molecular Function. Frequency indicates the number of genes in UniProt associated with this term. Uniqueness is a measurement of average similarity of a term to all other GO terms, while dispensability measures the semantic distance between a term and all other GO terms.

Figure S1

# ITS\_ML tree

## Mycobank species

|                                           |
|-------------------------------------------|
| <u><i>Naganishia adeliensis</i></u>       |
| <u><i>Naganishia albida</i></u>           |
| <u><i>Naganishia albidosimilis</i></u>    |
| <u><i>Naganishia antarctica</i></u>       |
| <u><i>Naganishia bhutanensis</i></u>      |
| <u><i>Naganishia brisbanensis</i></u>     |
| <u><i>Naganishia cerealis</i></u>         |
| <u><i>Naganishia diffuens</i></u>         |
| <u><i>Naganishia floricola</i></u>        |
| <u><i>Naganishia friedmannii</i></u>      |
| <u><i>Naganishia globosa</i></u>          |
| <u><i>Naganishia indica</i> (no ITS)</u>  |
| <u><i>Naganishia liquefaciens</i></u>     |
| <u><i>Naganishia nivalis</i></u>          |
| <u><i>Naganishia onofrii</i></u>          |
| <u><i>Naganishia qatarensis</i></u>       |
| <u><i>Naganishia randhawae</i></u>        |
| <u><i>Naganishia uzbekistanensis</i></u>  |
| <u><i>Naganishia vaughanmartiniae</i></u> |
| <u><i>Naganishia vishniacii</i></u>       |

## CBS species

|                                    |
|------------------------------------|
| <i>Naganishia adeliensis</i>       |
| <i>Naganishia albidosimilis</i>    |
| <i>Naganishia antarctica</i>       |
| <i>Naganishia bhutanensis</i>      |
| <i>Naganishia diffuens</i>         |
| <i>Naganishia friedmannii</i>      |
| <i>Naganishia globosa</i>          |
| <i>Naganishia randhawae</i>        |
| <i>Naganishia uzbekistanensis</i>  |
| <i>Naganishia vaughanmartiniae</i> |
| <i>Naganishia vishniacii</i>       |

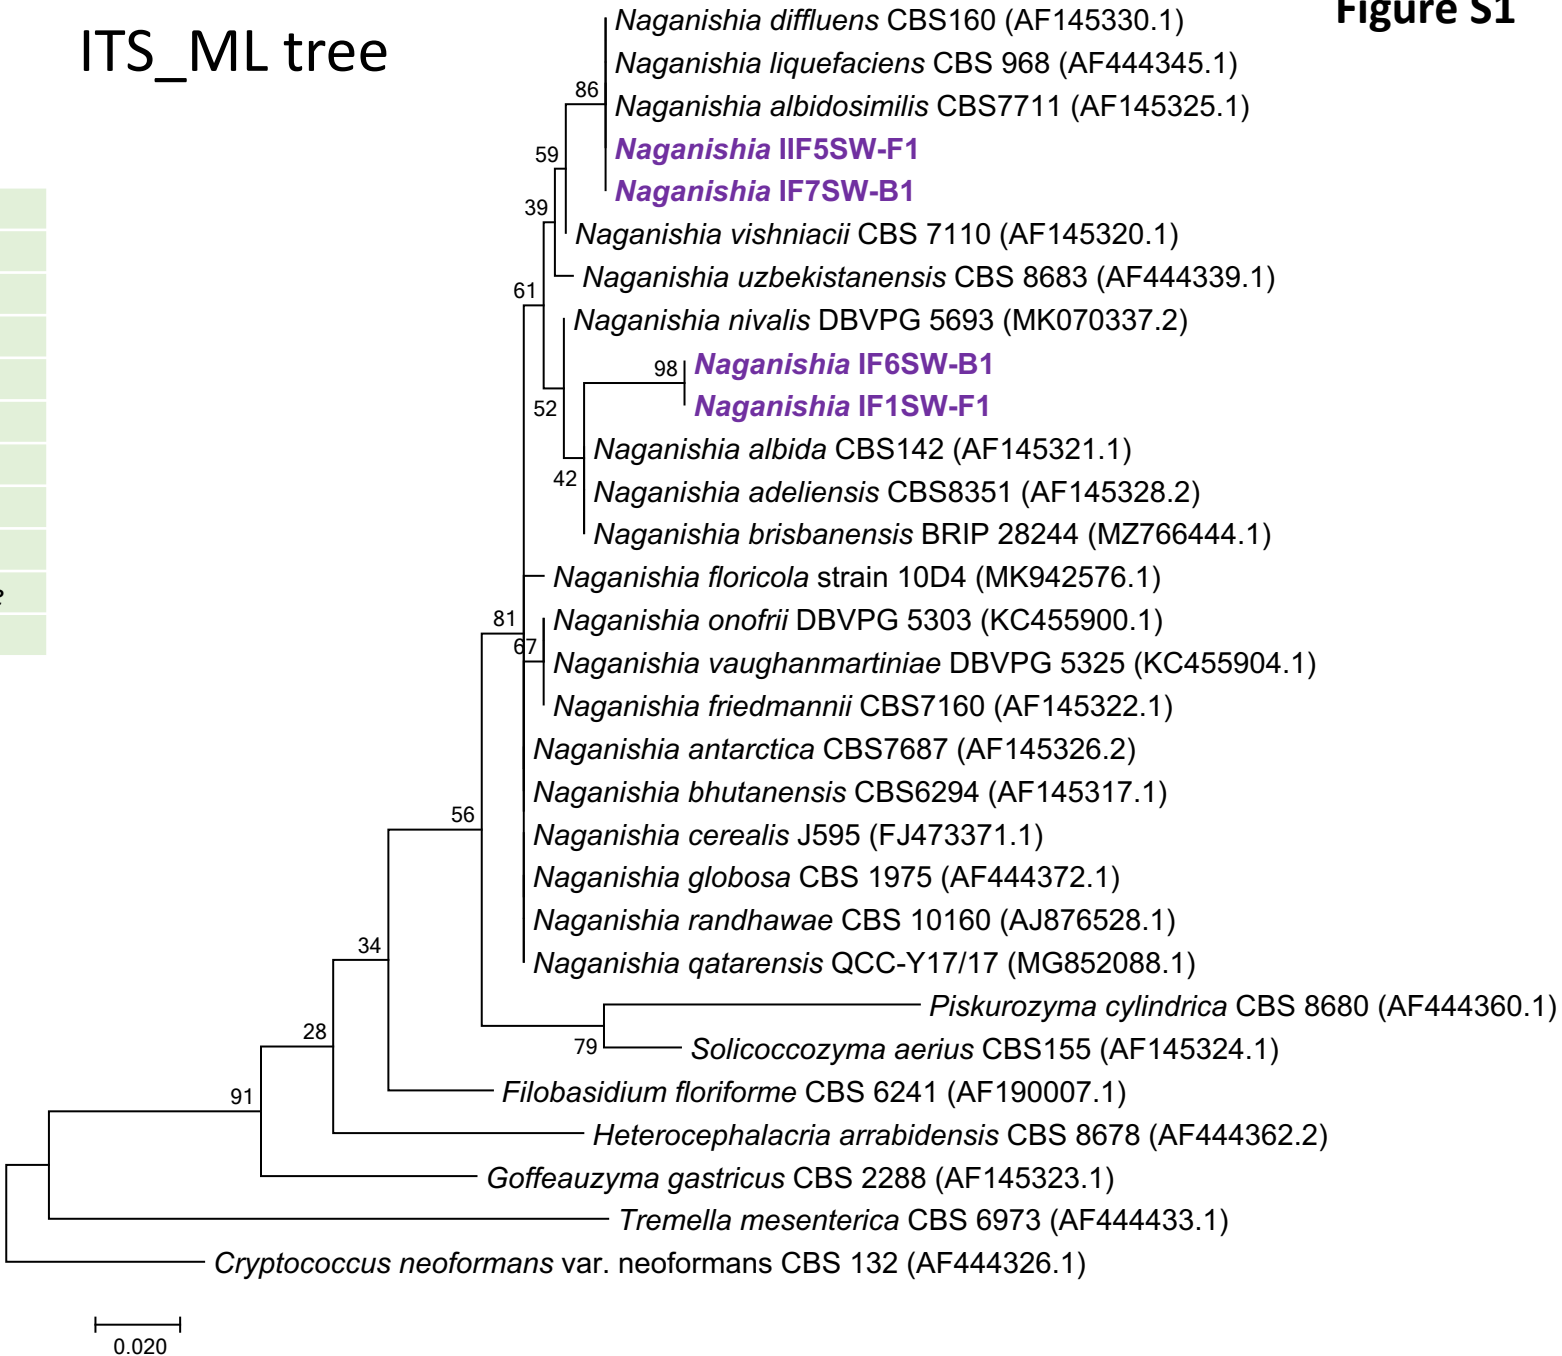

LSU\_ML tree

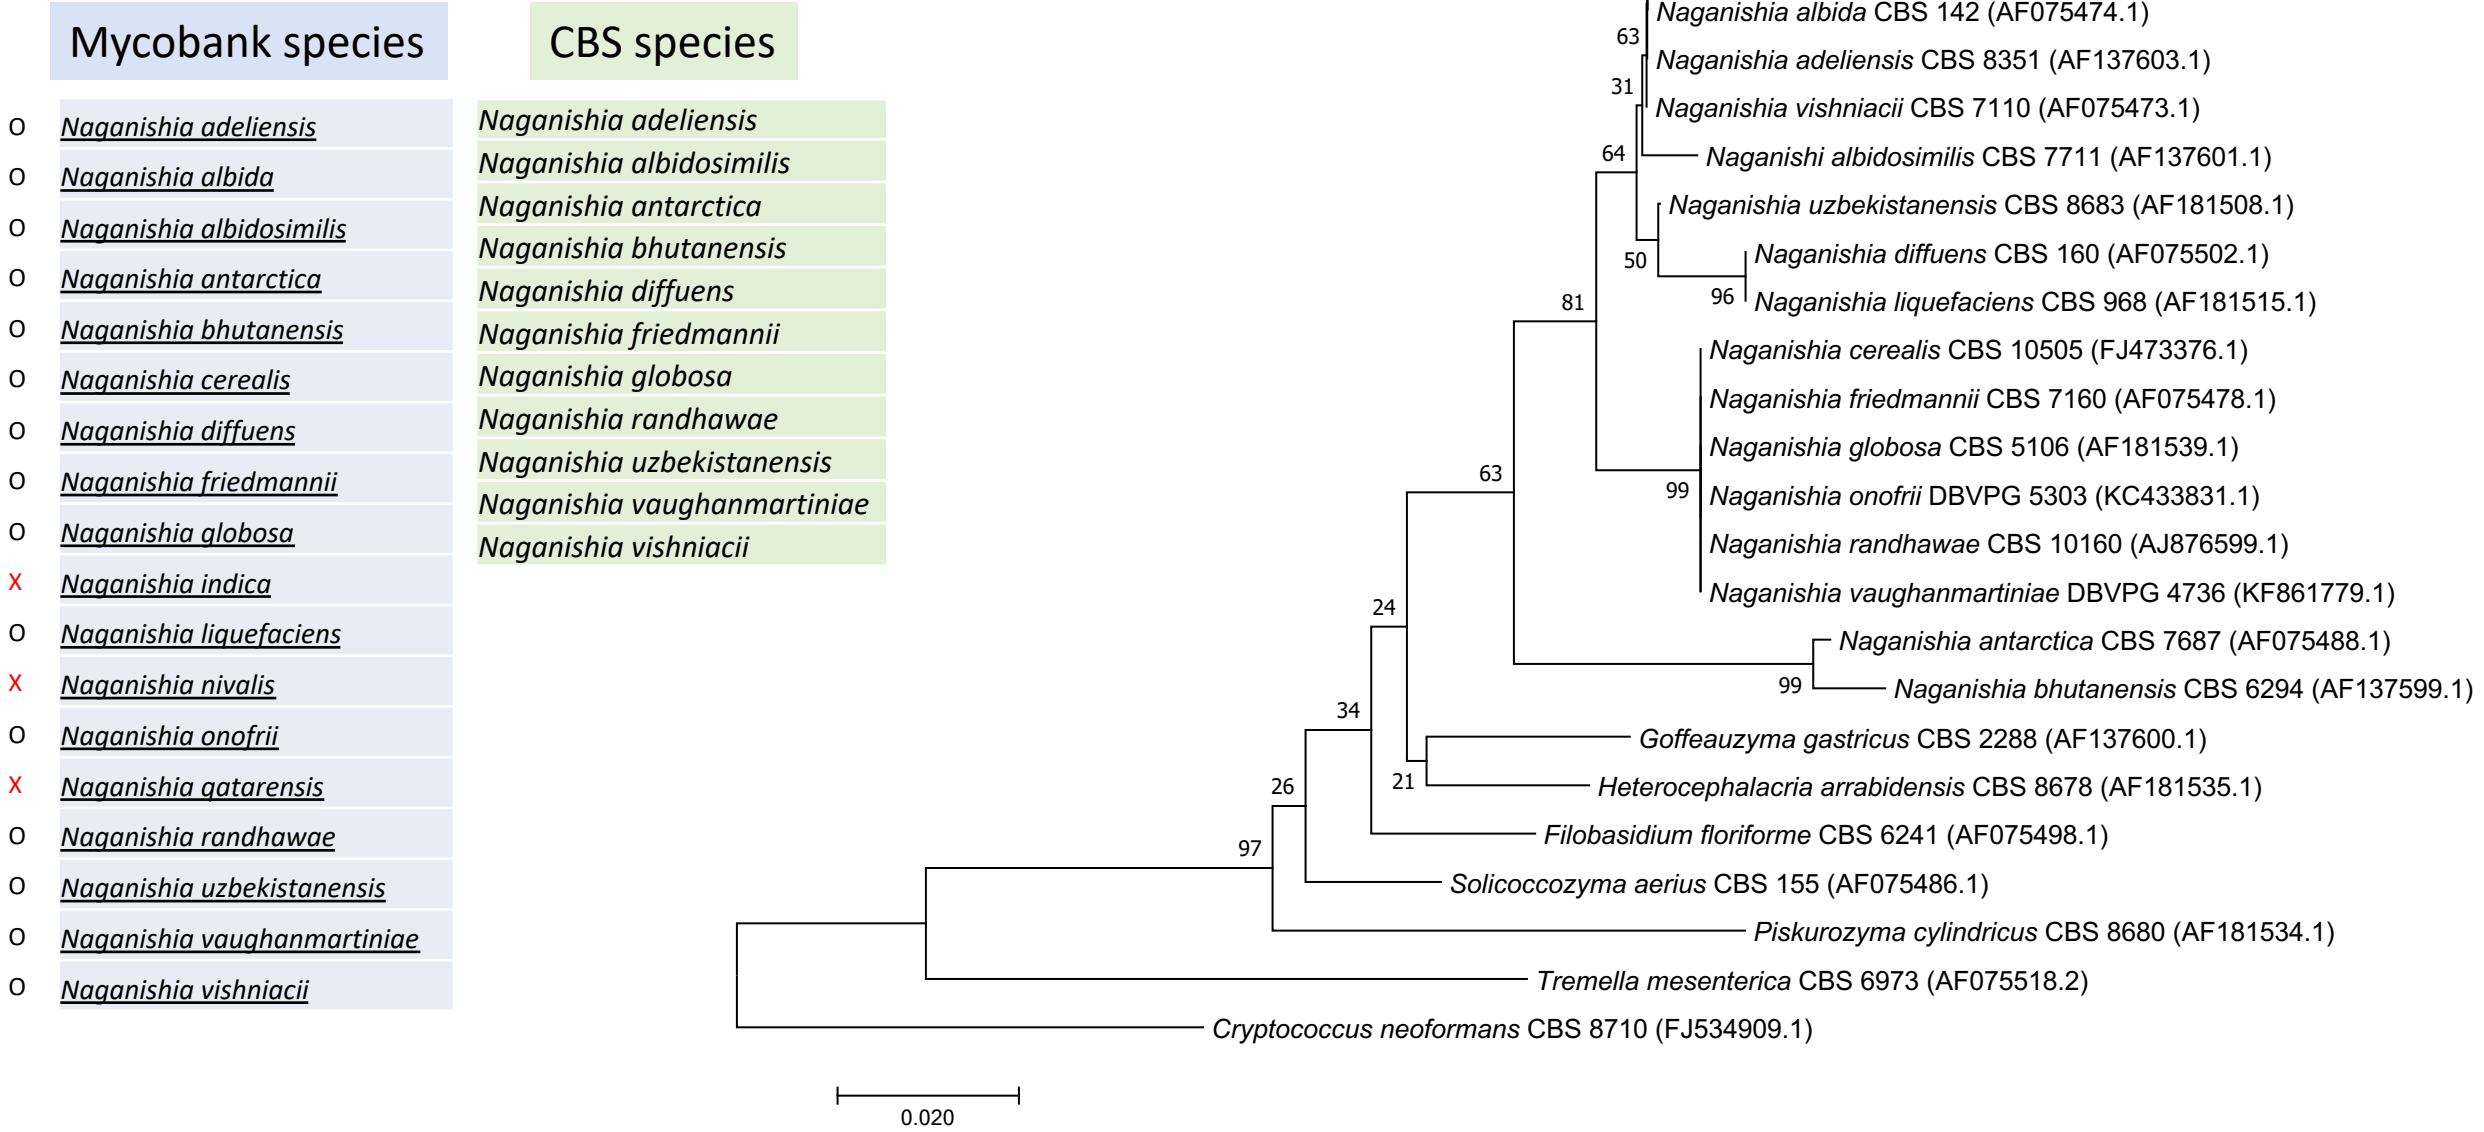

Figure S3

# SSU\_ML tree

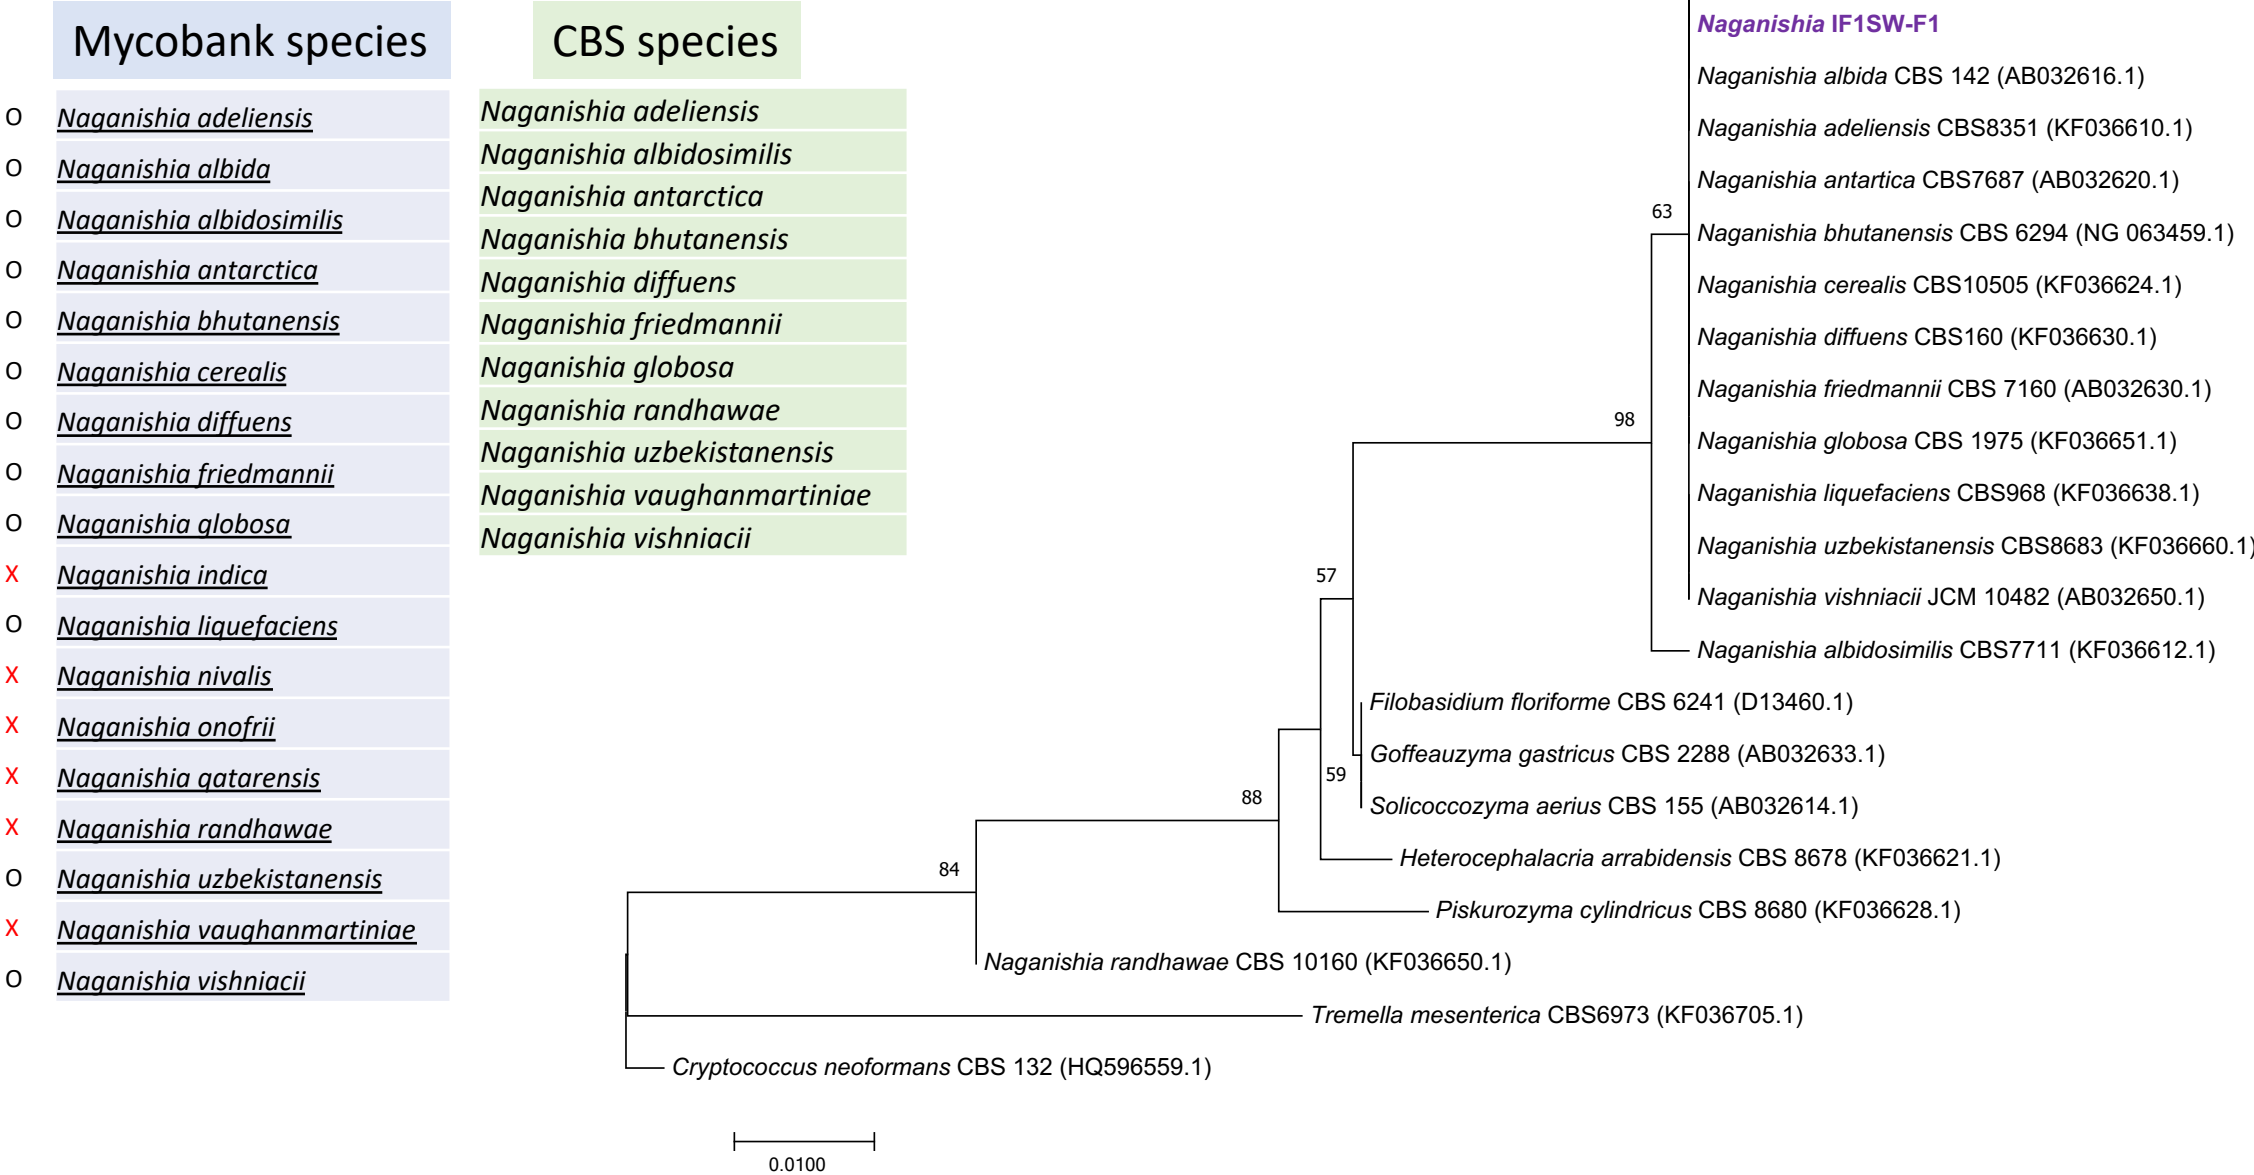

CYTB\_ML tree

Figure S4

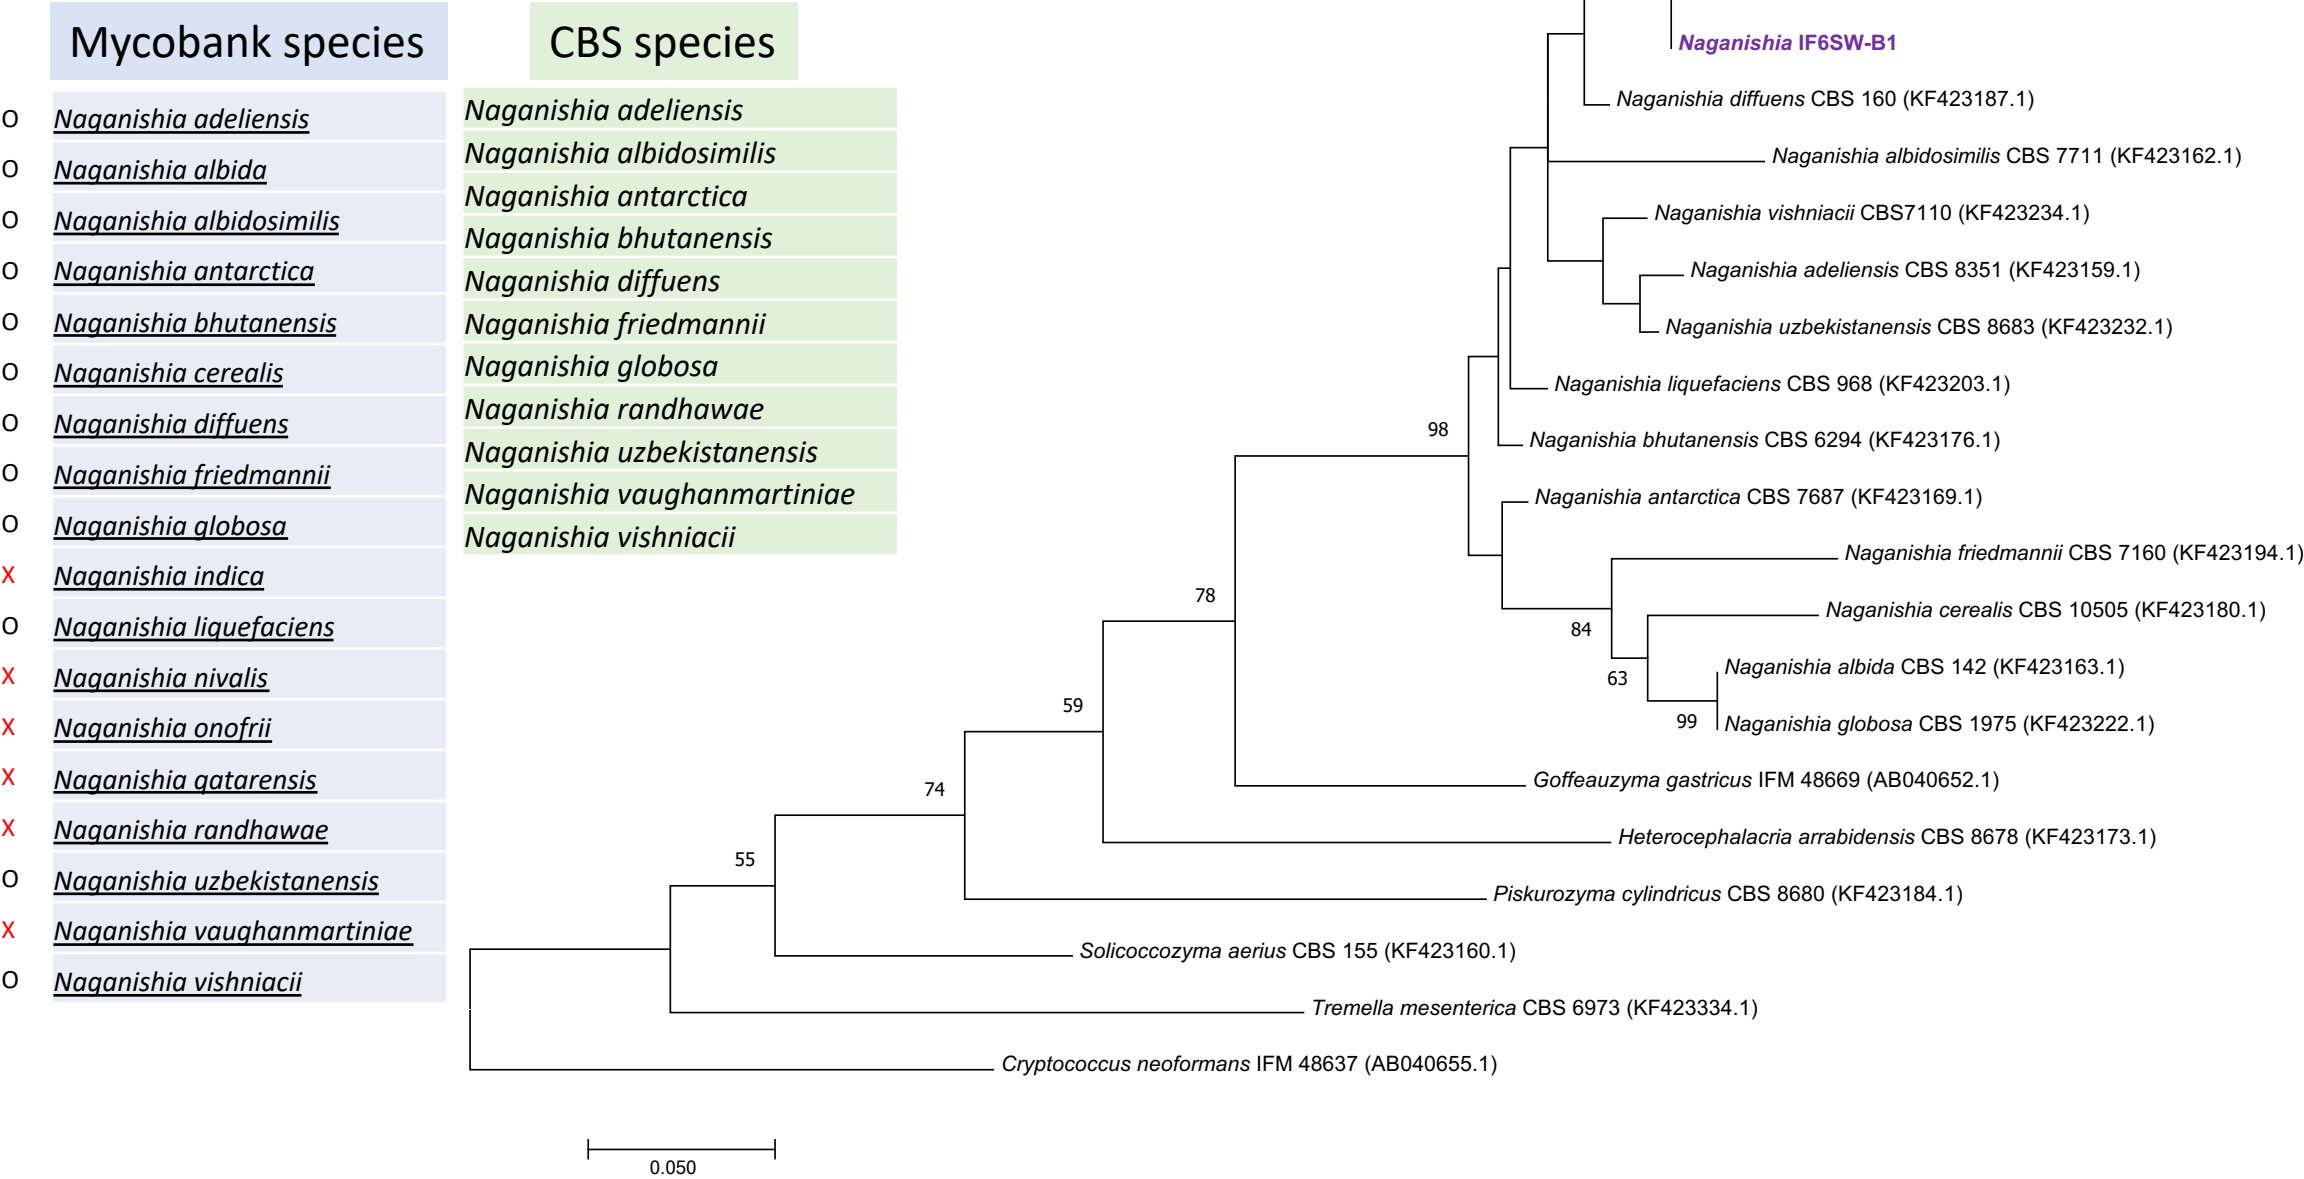

Figure S5

RPB1\_ML tree

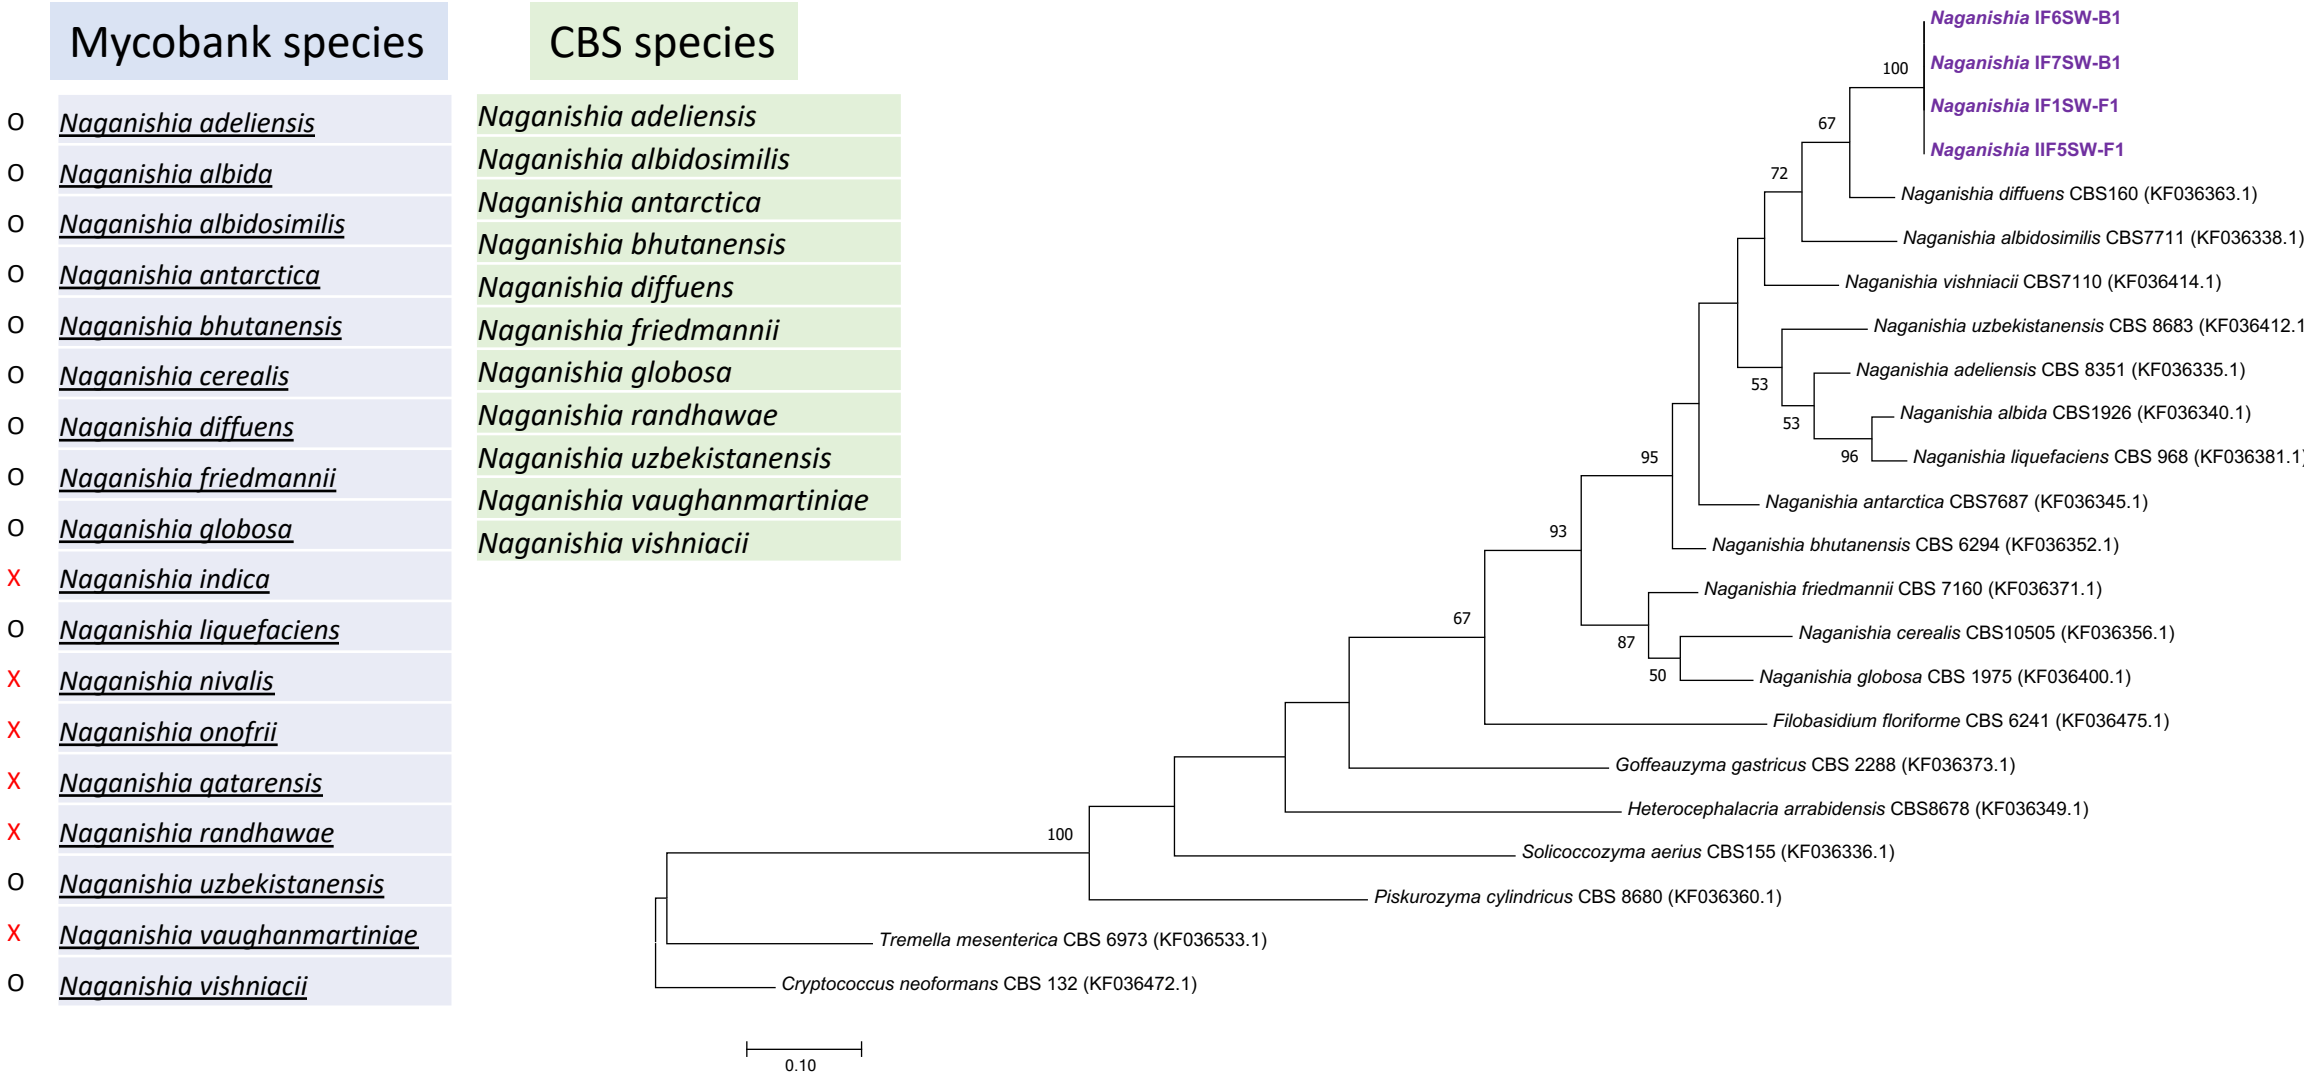

RPB2\_ML tree

Figure S6

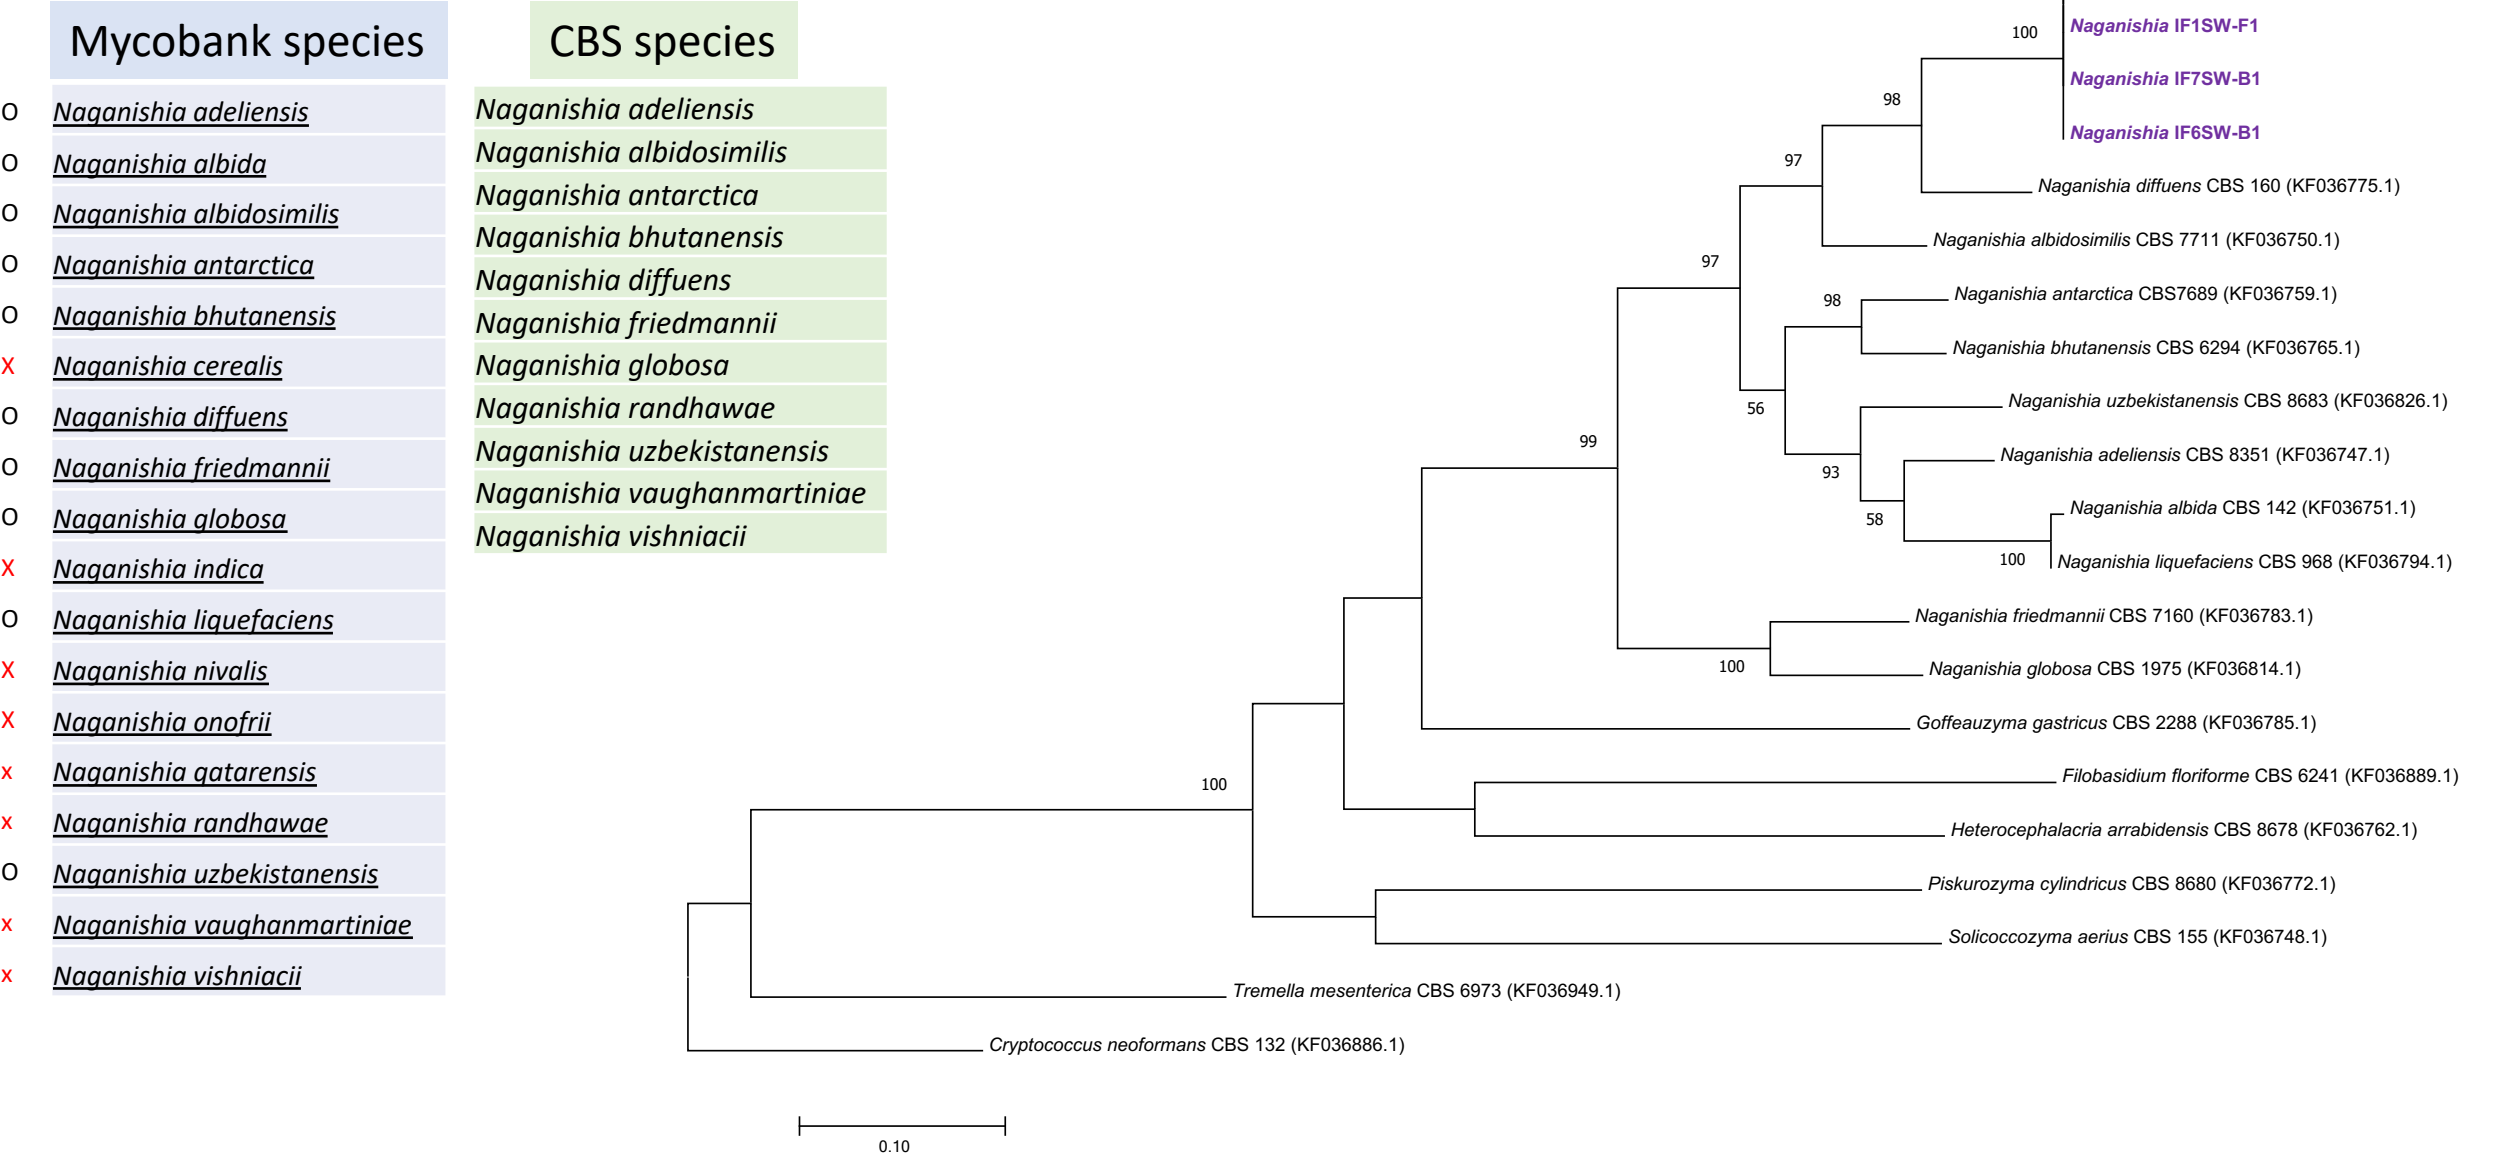



TEF1\_ML tree

Figure S7

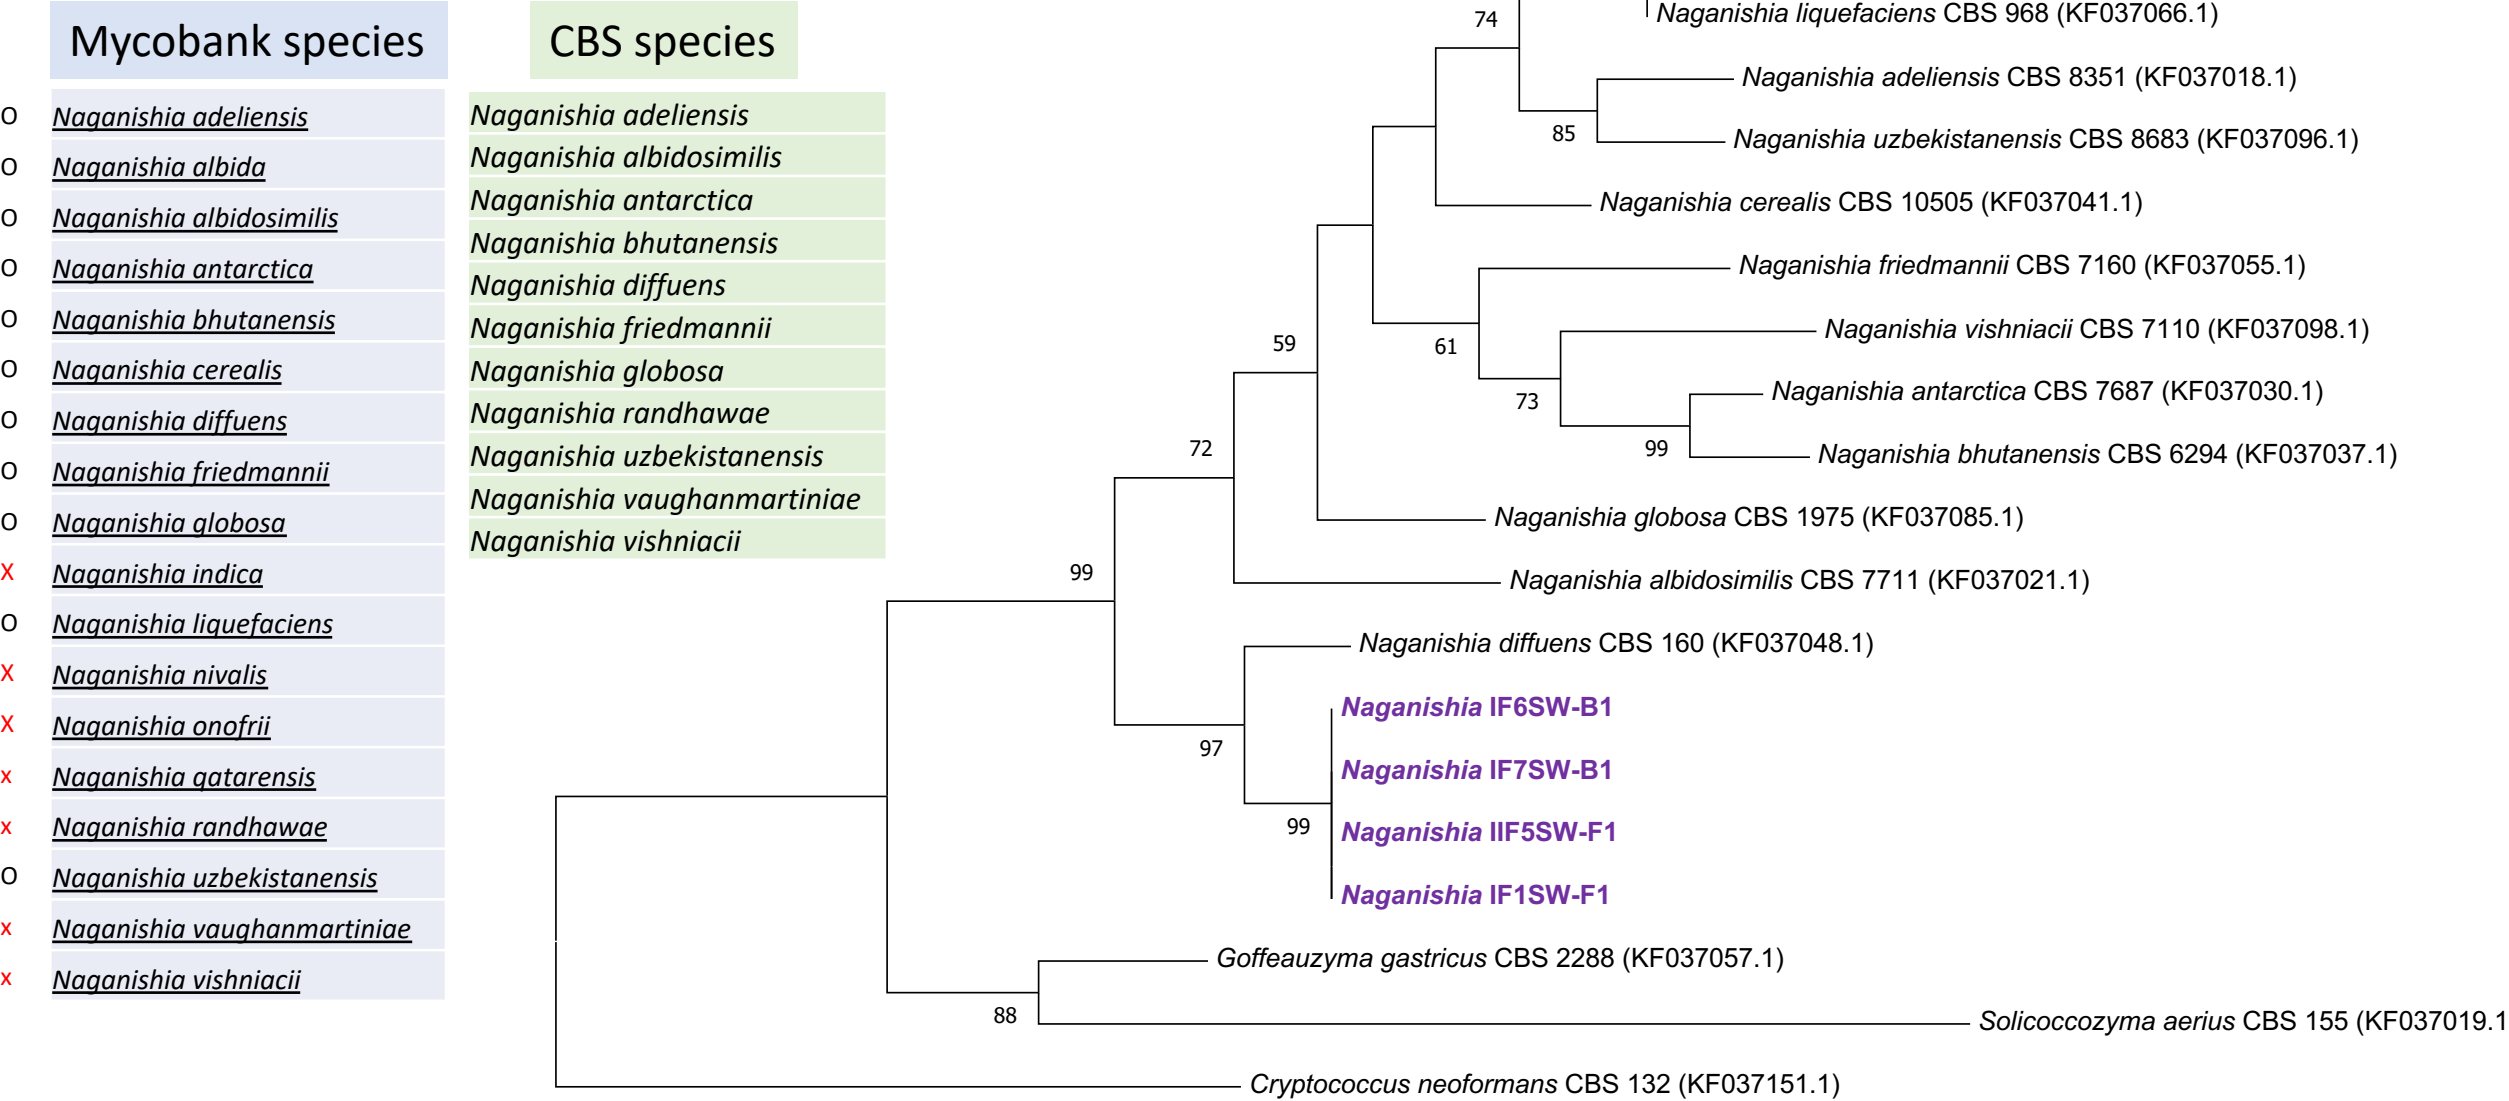



Figure S8

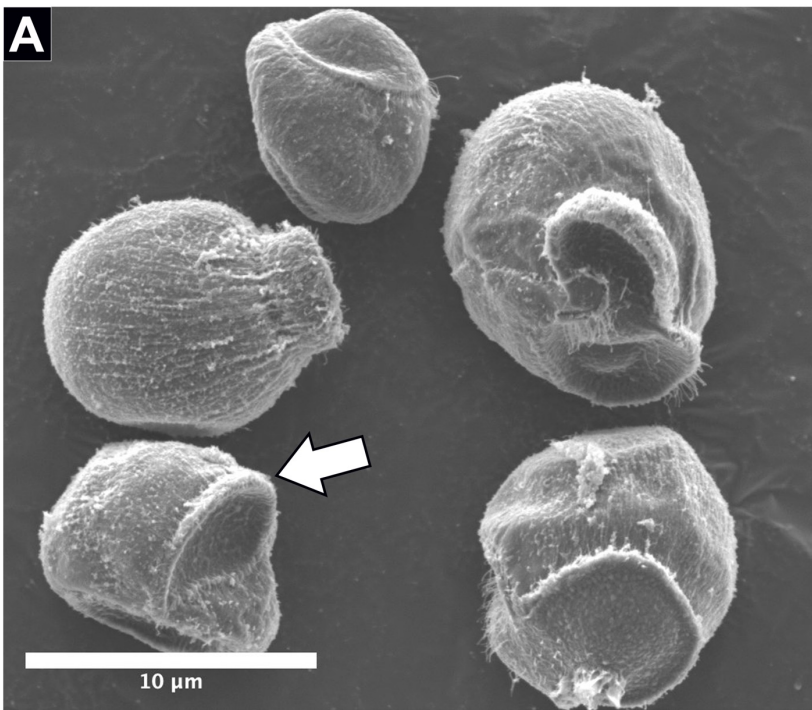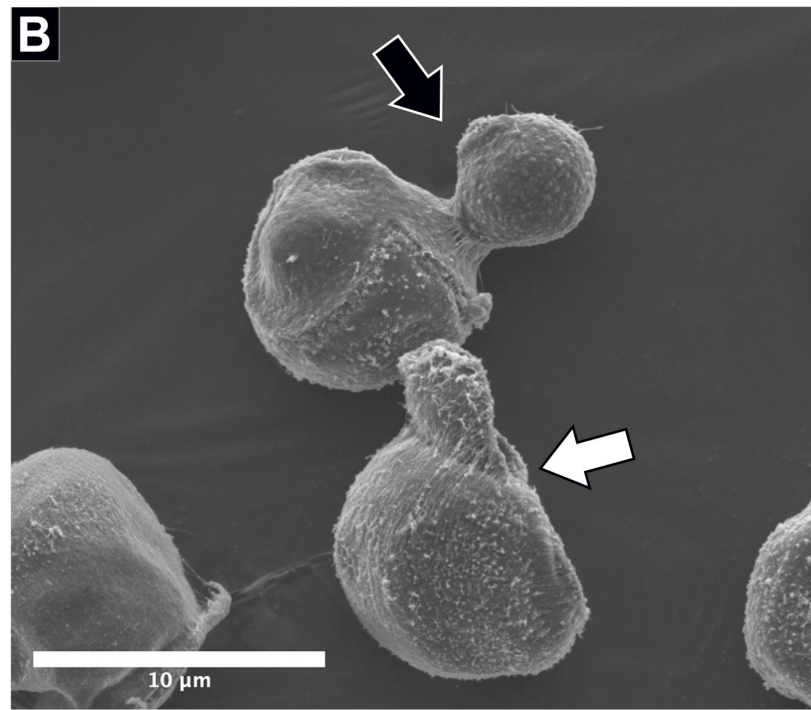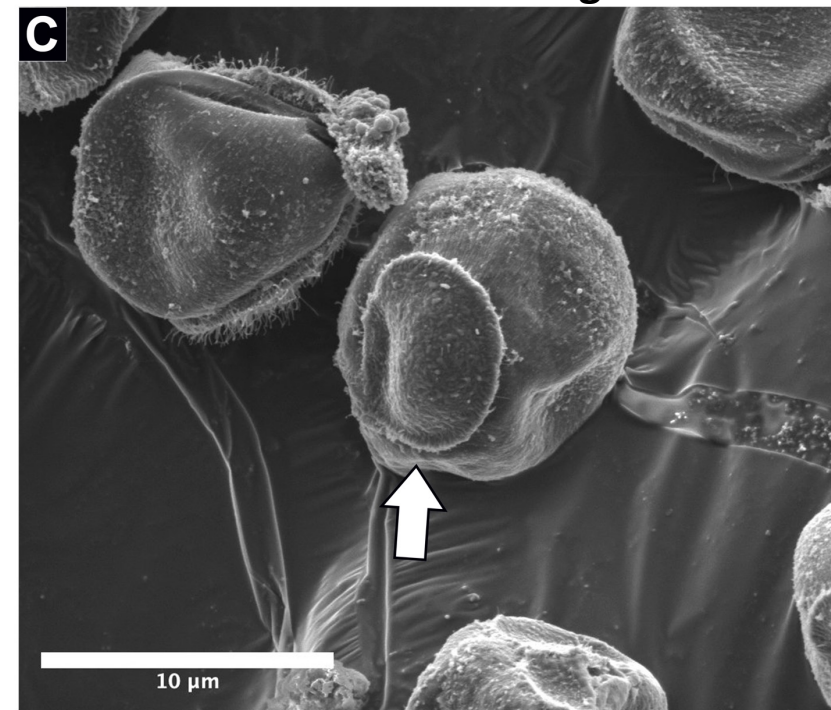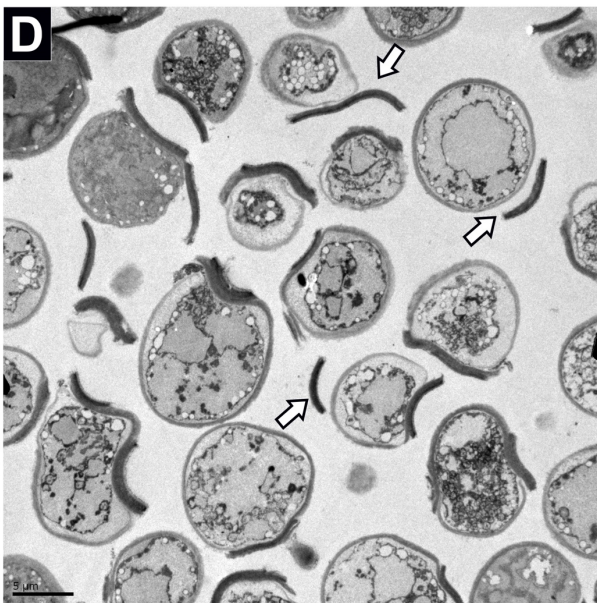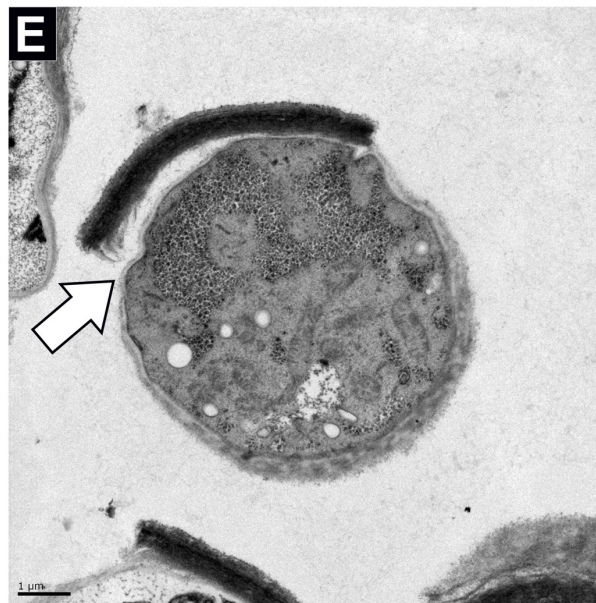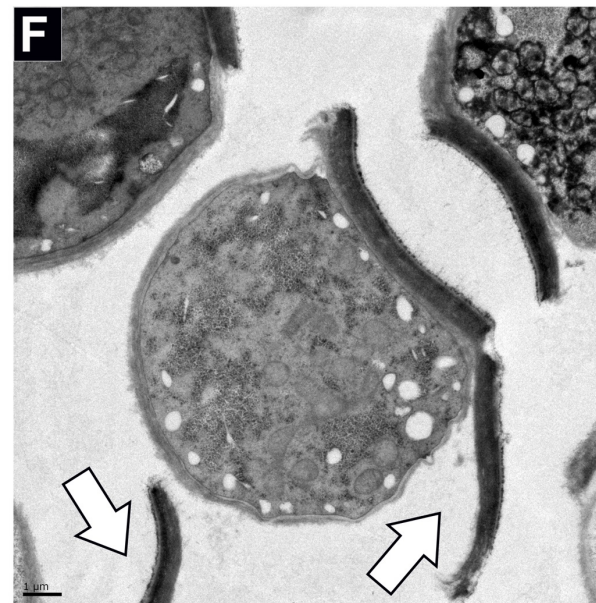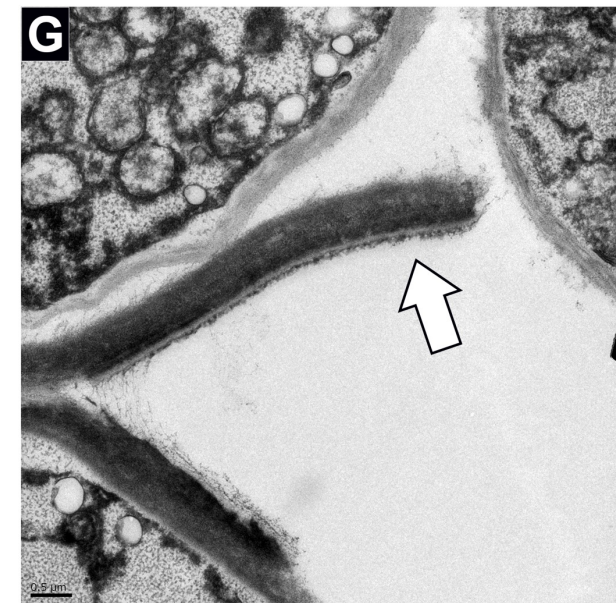

| Term ID    | Name                                                        | Frequency | Uniqueness | Dispensability |
|------------|-------------------------------------------------------------|-----------|------------|----------------|
| GO:0000902 | cell morphogenesis                                          | 0.37%     | 1          | 0              |
| GO:0007017 | microtubule-based process                                   | 1.61%     | 0.99       | 0              |
| GO:0009411 | response to UV                                              | 0.15%     | 0.96       | 0              |
| GO:0046034 | ATP metabolic process                                       | 1.58%     | 0.94       | 0              |
| GO:2001256 | regulation of store-operated calcium entry                  | 0.03%     | 0.97       | 0              |
| GO:0031144 | proteasome localization                                     | 0.03%     | 0.95       | 0              |
| GO:0007018 | microtubule-based movement                                  | 0.38%     | 0.98       | 0.01           |
| GO:0006458 | 'de novo' protein folding                                   | 0.43%     | 0.99       | 0.01           |
| GO:0007031 | peroxisome organization                                     | 0.86%     | 0.93       | 0.01           |
| GO:0061640 | cytoskeleton-dependent cytokinesis                          | 1.19%     | 0.97       | 0.01           |
| GO:0006457 | protein folding                                             | 1.97%     | 0.99       | 0.01           |
| GO:0006662 | glycerol ether metabolic process                            | 0.03%     | 0.85       | 0.04           |
| GO:0006072 | glycerol-3-phosphate metabolic process                      | 0.07%     | 0.87       | 0.04           |
| GO:0000103 | sulfate assimilation                                        | 0.15%     | 0.91       | 0.04           |
| GO:0006081 | cellular aldehyde metabolic process                         | 0.60%     | 0.93       | 0.05           |
| GO:0006099 | tricarboxylic acid cycle                                    | 0.50%     | 0.92       | 0.05           |
| GO:0009308 | amine metabolic process                                     | 0.43%     | 0.88       | 0.05           |
| GO:0005991 | trehalose metabolic process                                 | 0.18%     | 0.9        | 0.06           |
| GO:0032259 | methylation                                                 | 1.84%     | 0.94       | 0.06           |
| GO:0006914 | autophagy                                                   | 2.90%     | 0.89       | 0.06           |
| GO:0005975 | carbohydrate metabolic process                              | 3.86%     | 0.91       | 0.08           |
| GO:0032780 | negative regulation of ATPase activity                      | 0.05%     | 0.96       | 0.09           |
| GO:0009058 | biosynthetic process                                        | 25.36%    | 0.91       | 0.1            |
| GO:0055088 | lipid homeostasis                                           | 0.56%     | 0.95       | 0.11           |
| GO:0006629 | lipid metabolic process                                     | 5.30%     | 0.9        | 0.11           |
| GO:0018298 | protein-chromophore linkage                                 | 0.02%     | 0.86       | 0.11           |
| GO:0045329 | carnitine biosynthetic process                              | 0.02%     | 0.82       | 0.11           |
| GO:0016480 | negative regulation of transcription by RNA polymerase III  | 0.08%     | 0.95       | 0.12           |
| GO:0015706 | nitrate transport                                           | 0.02%     | 0.94       | 0.12           |
| GO:0042558 | pteridine-containing compound metabolic process             | 0.30%     | 0.83       | 0.14           |
| GO:0009272 | fungal-type cell wall biogenesis                            | 1.41%     | 0.93       | 0.14           |
| GO:0071586 | CAAX-box protein processing                                 | 0.03%     | 0.84       | 0.15           |
| GO:0006260 | DNA replication                                             | 2.07%     | 0.79       | 0.17           |
| GO:0009966 | regulation of signal transduction                           | 2.32%     | 0.94       | 0.17           |
| GO:0043631 | RNA polyadenylation                                         | 0.43%     | 0.8        | 0.18           |
| GO:0016559 | peroxisome fission                                          | 0.15%     | 0.94       | 0.2            |
| GO:0061817 | endoplasmic reticulum-plasma membrane tethering             | 0.08%     | 0.9        | 0.2            |
| GO:0042407 | cristae formation                                           | 0.17%     | 0.93       | 0.2            |
| GO:0006596 | polyamine biosynthetic process                              | 0.07%     | 0.79       | 0.21           |
| GO:0019915 | lipid storage                                               | 0.12%     | 0.94       | 0.21           |
| GO:0034198 | cellular response to amino acid starvation                  | 0.28%     | 0.94       | 0.21           |
| GO:1901642 | nucleoside transmembrane transport                          | 0.07%     | 0.94       | 0.21           |
| GO:0030261 | chromosome condensation                                     | 0.33%     | 0.92       | 0.22           |
| GO:0007034 | vacuolar transport                                          | 3.03%     | 0.93       | 0.22           |
| GO:0006480 | N-terminal protein amino acid methylation                   | 0.03%     | 0.85       | 0.22           |
| GO:0006807 | nitrogen compound metabolic process                         | 47.24%    | 0.9        | 0.22           |
| GO:0042176 | regulation of protein catabolic process                     | 0.43%     | 0.95       | 0.23           |
| GO:0019538 | protein metabolic process                                   | 23.24%    | 0.79       | 0.23           |
| GO:0048268 | clathrin coat assembly                                      | 0.07%     | 0.93       | 0.23           |
| GO:0006101 | citrate metabolic process                                   | 0.03%     | 0.83       | 0.24           |
| GO:0042256 | mature ribosome assembly                                    | 0.10%     | 0.92       | 0.24           |
| GO:0006779 | porphyrin-containing compound biosynthetic process          | 0.28%     | 0.75       | 0.25           |
| GO:0018342 | protein prenylation                                         | 0.13%     | 0.83       | 0.25           |
| GO:0006370 | 7-methylguanosine mRNA capping                              | 0.13%     | 0.8        | 0.26           |
| GO:0051103 | DNA ligation involved in DNA repair                         | 0.02%     | 0.82       | 0.26           |
| GO:0006744 | ubiquinone biosynthetic process                             | 0.23%     | 0.78       | 0.27           |
| GO:0006891 | intra-Golgi vesicle-mediated transport                      | 0.53%     | 0.92       | 0.27           |
| GO:0001522 | pseudouridine synthesis                                     | 0.27%     | 0.78       | 0.27           |
| GO:0006275 | regulation of DNA replication                               | 0.90%     | 0.95       | 0.28           |
| GO:0007010 | cytoskeleton organization                                   | 3.86%     | 0.92       | 0.28           |
| GO:0007015 | actin filament organization                                 | 1.04%     | 0.92       | 0.29           |
| GO:0000413 | protein peptidyl-prolyl isomerization                       | 0.27%     | 0.82       | 0.29           |
| GO:0000959 | mitochondrial RNA metabolic process                         | 0.75%     | 0.79       | 0.3            |
| GO:0042128 | nitrate assimilation                                        | 0.05%     | 0.81       | 0.32           |
| GO:0006606 | protein import into nucleus                                 | 1.01%     | 0.91       | 0.32           |
| GO:1990426 | mitotic recombination-dependent replication fork processing | 0.02%     | 0.8        | 0.33           |
| GO:0097193 | intrinsic apoptotic signaling pathway                       | 0.02%     | 0.93       | 0.33           |
| GO:0051259 | protein complex oligomerization                             | 0.13%     | 0.93       | 0.33           |
| GO:0070072 | vacuolar proton-transporting V-type ATPase complex assembly | 0.08%     | 0.93       | 0.33           |
| GO:0046417 | chorismate metabolic process                                | 0.08%     | 0.81       | 0.34           |
| GO:0006414 | translational elongation                                    | 0.56%     | 0.74       | 0.34           |
| GO:0015074 | DNA integration                                             | 0.83%     | 0.78       | 0.35           |
| GO:0032784 | regulation of DNA-templated transcription, elongation       | 0.91%     | 0.94       | 0.35           |
| GO:0044237 | cellular metabolic process                                  | 54.67%    | 0.89       | 0.35           |
| GO:0009451 | RNA modification                                            | 1.84%     | 0.75       | 0.35           |
| GO:0016311 | dephosphorylation                                           | 2.07%     | 0.86       | 0.36           |
| GO:0007005 | mitochondrion organization                                  | 4.51%     | 0.92       | 0.36           |
| GO:0006139 | nucleobase-containing compound metabolic process            | 24.52%    | 0.75       | 0.37           |
| GO:0016579 | protein deubiquitination                                    | 0.53%     | 0.8        | 0.37           |
| GO:0006419 | alanyl-tRNA aminoacylation                                  | 0.02%     | 0.7        | 0.38           |
| GO:0006011 | UDP-glucose metabolic process                               | 0.08%     | 0.74       | 0.38           |
| GO:0006508 | proteolysis                                                 | 7.00%     | 0.8        | 0.38           |
| GO:0034599 | cellular response to oxidative stress                       | 1.84%     | 0.93       | 0.39           |
| GO:0016192 | vesicle-mediated transport                                  | 7.09%     | 0.92       | 0.39           |
| GO:0043248 | proteasome assembly                                         | 0.53%     | 0.92       | 0.39           |
| GO:0045901 | positive regulation of translational elongation             | 0.07%     | 0.94       | 0.39           |

| Term ID    | Name                                                         | Frequency | Uniqueness | Dispensability |
|------------|--------------------------------------------------------------|-----------|------------|----------------|
| GO:0005576 | extracellular region                                         | 1.96%     | 1          | 0              |
| GO:0005777 | peroxisome                                                   | 1.51%     | 0.98       | 0              |
| GO:0019867 | outer membrane                                               | 1.92%     | 0.93       | 0              |
| GO:0005618 | cell wall                                                    | 2.27%     | 0.97       | 0              |
| GO:0016020 | membrane                                                     | 34.69%    | 1          | 0              |
| GO:0005737 | cytoplasm                                                    | 73.82%    | 0.99       | 0.01           |
| GO:0005853 | eukaryotic translation elongation factor 1 complex           | 0.02%     | 0.87       | 0.01           |
| GO:0005840 | ribosome                                                     | 4.16%     | 0.88       | 0.01           |
| GO:0005801 | cis-Golgi network                                            | 0.28%     | 0.94       | 0.02           |
| GO:0005759 | mitochondrial matrix                                         | 3.98%     | 0.87       | 0.02           |
| GO:0005829 | cytosol                                                      | 16.60%    | 0.98       | 0.03           |
| GO:0005634 | nucleus                                                      | 39.66%    | 0.97       | 0.04           |
| GO:0005739 | mitochondrion                                                | 19.85%    | 0.97       | 0.07           |
| GO:0031251 | PAN complex                                                  | 0.03%     | 0.86       | 0.08           |
| GO:0005835 | fatty acid synthase complex                                  | 0.03%     | 0.86       | 0.08           |
| GO:0042555 | MCM complex                                                  | 0.10%     | 0.85       | 0.09           |
| GO:0032299 | ribonuclease H2 complex                                      | 0.05%     | 0.78       | 0.09           |
| GO:0016272 | prefoldin complex                                            | 0.10%     | 0.85       | 0.1            |
| GO:0005786 | signal recognition particle, endoplasmic reticulum targeting | 0.10%     | 0.81       | 0.1            |
| GO:0005852 | eukaryotic translation initiation factor 3 complex           | 0.12%     | 0.85       | 0.1            |
| GO:0008180 | COP9 signalosome                                             | 0.12%     | 0.79       | 0.1            |
| GO:0045239 | tricarboxylic acid cycle enzyme complex                      | 0.17%     | 0.85       | 0.1            |
| GO:0030117 | membrane coat                                                | 0.58%     | 0.7        | 0.15           |
| GO:0009316 | 3-isopropylmalate dehydratase complex                        | 0.02%     | 0.8        | 0.18           |
| GO:0009349 | riboflavin synthase complex                                  | 0.02%     | 0.79       | 0.21           |
| GO:0016021 | integral component of membrane                               | 20.92%    | 0.91       | 0.25           |
| GO:0072686 | mitotic spindle                                              | 0.32%     | 0.87       | 0.25           |
| GO:0000178 | exosome (RNase complex)                                      | 0.27%     | 0.76       | 0.25           |
| GO:0005960 | glycine cleavage complex                                     | 0.05%     | 0.76       | 0.27           |
| GO:0000214 | tRNA-intron endonuclease complex                             | 0.07%     | 0.74       | 0.28           |
| GO:0005760 | gamma DNA polymerase complex                                 | 0.02%     | 0.69       | 0.29           |
| GO:0000776 | kinetochore                                                  | 1.19%     | 0.82       | 0.3            |
| GO:0005849 | mRNA cleavage factor complex                                 | 0.33%     | 0.77       | 0.3            |
| GO:0030289 | protein phosphatase 4 complex                                | 0.05%     | 0.74       | 0.31           |
| GO:0031417 | NatC complex                                                 | 0.05%     | 0.74       | 0.31           |
| GO:0048500 | signal recognition particle                                  | 0.10%     | 0.81       | 0.31           |
| GO:0005956 | protein kinase CK2 complex                                   | 0.07%     | 0.78       | 0.32           |
| GO:0033588 | elongator holoenzyme complex                                 | 0.10%     | 0.77       | 0.33           |
| GO:0000145 | exocyst                                                      | 0.15%     | 0.81       | 0.33           |
| GO:0016592 | mediator complex                                             | 0.46%     | 0.77       | 0.34           |
| GO:0005783 | endoplasmic reticulum                                        | 11.42%    | 0.93       | 0.34           |
| GO:0030015 | CCR4-NOT core complex                                        | 0.17%     | 0.76       | 0.35           |
| GO:0005741 | mitochondrial outer membrane                                 | 1.77%     | 0.82       | 0.36           |
| GO:0005732 | sno(s)RNA-containing ribonucleoprotein complex               | 0.55%     | 0.78       | 0.36           |
| GO:0005694 | chromosome                                                   | 8.15%     | 0.87       | 0.39           |
| GO:0005663 | DNA replication factor C complex                             | 0.08%     | 0.78       | 0.4            |



| Term ID    | Name                                                                                    | Frequency | Uniqueness | Dispensability |
|------------|-----------------------------------------------------------------------------------------|-----------|------------|----------------|
| GO:0003774 | cytoskeletal motor activity                                                             | 0.27%     | 1          | 0              |
| GO:0003777 | microtubule motor activity                                                              | 0.17%     | 0.98       | 0              |
| GO:0005049 | nuclear export signal receptor activity                                                 | 0.05%     | 0.97       | 0              |
| GO:0030246 | carbohydrate binding                                                                    | 0.56%     | 0.99       | 0              |
| GO:0050385 | ureidoglycolate lyase activity                                                          | 0.02%     | 0.86       | 0              |
| GO:0030955 | potassium ion binding                                                                   | 0.03%     | 0.97       | 0.03           |
| GO:0032051 | clathrin light chain binding                                                            | 0.03%     | 0.99       | 0.03           |
| GO:0030942 | endoplasmic reticulum signal peptide binding                                            | 0.05%     | 0.98       | 0.03           |
| GO:0008061 | chitin binding                                                                          | 0.08%     | 0.98       | 0.03           |
| GO:0071933 | Arp2/3 complex binding                                                                  | 0.08%     | 0.98       | 0.03           |
| GO:0005536 | glucose binding                                                                         | 0.12%     | 0.97       | 0.03           |
| GO:0020037 | heme binding                                                                            | 0.43%     | 0.97       | 0.03           |
| GO:0043015 | gamma-tubulin binding                                                                   | 0.03%     | 0.98       | 0.07           |
| GO:0080132 | fatty acid alpha-hydroxylase activity                                                   | 0.02%     | 0.83       | 0.07           |
| GO:0017025 | TBP-class protein binding                                                               | 0.30%     | 0.98       | 0.08           |
| GO:0019903 | protein phosphatase binding                                                             | 0.27%     | 0.98       | 0.09           |
| GO:0030276 | clathrin binding                                                                        | 0.35%     | 0.98       | 0.09           |
| GO:0004334 | fumarylacetoacetase activity                                                            | 0.02%     | 0.85       | 0.09           |
| GO:0004452 | isopentenyl-diphosphate delta-isomerase activity                                        | 0.02%     | 0.86       | 0.09           |
| GO:0004637 | phosphoribosylamine-glycine ligase activity                                             | 0.02%     | 0.84       | 0.09           |
| GO:0008410 | CoA-transferase activity                                                                | 0.02%     | 0.84       | 0.09           |
| GO:0051087 | chaperone binding                                                                       | 0.43%     | 0.98       | 0.1            |
| GO:0046982 | protein heterodimerization activity                                                     | 0.56%     | 0.98       | 0.1            |
| GO:1990610 | acetolactate synthase regulator activity                                                | 0.02%     | 0.98       | 0.11           |
| GO:0000340 | RNA 7-methylguanosine cap binding                                                       | 0.05%     | 0.96       | 0.12           |
| GO:0030983 | mismatched DNA binding                                                                  | 0.22%     | 0.96       | 0.18           |
| GO:0003860 | 3-hydroxyisobutryl-CoA hydrolase activity                                               | 0.02%     | 0.84       | 0.18           |
| GO:0004013 | adenosylhomocysteinase activity                                                         | 0.02%     | 0.85       | 0.18           |
| GO:0004635 | phosphoribosyl-AMP cyclohydrolase activity                                              | 0.02%     | 0.84       | 0.18           |
| GO:0004636 | phosphoribosyl-ATP diphosphatase activity                                               | 0.02%     | 0.85       | 0.18           |
| GO:0004650 | polygalacturonase activity                                                              | 0.02%     | 0.85       | 0.18           |
| GO:0005319 | lipid transporter activity                                                              | 0.58%     | 0.94       | 0.19           |
| GO:0098599 | palmitoyl hydrolase activity                                                            | 0.03%     | 0.84       | 0.19           |
| GO:0000906 | 6,7-dimethyl-8-ribityllumazine synthase activity                                        | 0.02%     | 0.83       | 0.19           |
| GO:0003870 | 5-aminolevulinate synthase activity                                                     | 0.02%     | 0.83       | 0.19           |
| GO:0003871 | 5-methyltetrahydropteroyltriglutamate-homocysteine S-methyltransferase activity         | 0.02%     | 0.83       | 0.19           |
| GO:0004788 | thiamine diphosphokinase activity                                                       | 0.02%     | 0.83       | 0.19           |
| GO:0004802 | transketolase activity                                                                  | 0.03%     | 0.84       | 0.19           |
| GO:0008184 | glycogen phosphorylase activity                                                         | 0.02%     | 0.83       | 0.19           |
| GO:0030975 | thiamine binding                                                                        | 0.02%     | 0.96       | 0.2            |
| GO:0008199 | ferric iron binding                                                                     | 0.02%     | 0.97       | 0.2            |
| GO:0019239 | deaminase activity                                                                      | 0.20%     | 0.83       | 0.22           |
| GO:0016597 | amino acid binding                                                                      | 0.15%     | 0.97       | 0.23           |
| GO:0008483 | transaminase activity                                                                   | 0.37%     | 0.8        | 0.23           |
| GO:0032549 | ribonucleoside binding                                                                  | 0.05%     | 0.96       | 0.24           |
| GO:0050661 | NADP binding                                                                            | 0.30%     | 0.96       | 0.25           |
| GO:0005509 | calcium ion binding                                                                     | 0.46%     | 0.97       | 0.25           |
| GO:0070403 | NAD+ binding                                                                            | 0.10%     | 0.95       | 0.26           |
| GO:0008097 | 5S rRNA binding                                                                         | 0.08%     | 0.96       | 0.26           |
| GO:0030623 | U5 snRNA binding                                                                        | 0.08%     | 0.96       | 0.27           |
| GO:0071949 | FAD binding                                                                             | 0.23%     | 0.95       | 0.27           |
| GO:0008312 | 7S RNA binding                                                                          | 0.12%     | 0.96       | 0.28           |
| GO:0016208 | AMP binding                                                                             | 0.15%     | 0.94       | 0.28           |
| GO:0003725 | double-stranded RNA binding                                                             | 0.15%     | 0.96       | 0.29           |
| GO:0051287 | NAD binding                                                                             | 0.46%     | 0.95       | 0.29           |
| GO:0010181 | FMN binding                                                                             | 0.33%     | 0.95       | 0.29           |
| GO:0003747 | translation release factor activity                                                     | 0.10%     | 0.89       | 0.3            |
| GO:0050660 | flavin adenine dinucleotide binding                                                     | 0.56%     | 0.95       | 0.31           |
| GO:0004152 | dihydroorotate dehydrogenase activity                                                   | 0.02%     | 0.82       | 0.31           |
| GO:0004352 | glutamate dehydrogenase (NAD+) activity                                                 | 0.02%     | 0.82       | 0.31           |
| GO:0004499 | N,N-dimethylaniline monooxygenase activity                                              | 0.02%     | 0.83       | 0.31           |
| GO:0004754 | saccharopine dehydrogenase (NAD+, L-lysine-forming) activity                            | 0.02%     | 0.83       | 0.31           |
| GO:0008942 | nitrite reductase [NAD(P)H] activity                                                    | 0.02%     | 0.83       | 0.31           |
| GO:0009013 | succinate-semialdehyde dehydrogenase [NAD(P)+] activity                                 | 0.02%     | 0.82       | 0.31           |
| GO:0033743 | peptide-methionine (R)-S-oxide reductase activity                                       | 0.02%     | 0.82       | 0.31           |
| GO:0046577 | long-chain-alcohol oxidase activity                                                     | 0.02%     | 0.82       | 0.31           |
| GO:0004605 | phosphatidate cytidyltransferase activity                                               | 0.03%     | 0.82       | 0.31           |
| GO:0008531 | riboflavin kinase activity                                                              | 0.02%     | 0.81       | 0.31           |
| GO:0008484 | sulfuric ester hydrolase activity                                                       | 0.03%     | 0.83       | 0.32           |
| GO:0042132 | fructose 1,6-bisphosphate 1-phosphatase activity                                        | 0.02%     | 0.81       | 0.32           |
| GO:0008073 | ornithine decarboxylase inhibitor activity                                              | 0.02%     | 0.97       | 0.33           |
| GO:0070917 | inositol phosphoceramide synthase regulator activity                                    | 0.02%     | 0.98       | 0.33           |
| GO:0003958 | NADPH-hemoprotein reductase activity                                                    | 0.03%     | 0.82       | 0.33           |
| GO:0004096 | catalase activity                                                                       | 0.03%     | 0.82       | 0.34           |
| GO:0030599 | pectinesterase activity                                                                 | 0.07%     | 0.82       | 0.34           |
| GO:0003684 | damaged DNA binding                                                                     | 0.41%     | 0.96       | 0.36           |
| GO:0016701 | oxidoreductase activity, acting on single donors with incorporation of molecular oxygen | 0.08%     | 0.81       | 0.36           |
| GO:0004618 | phosphoglycerate kinase activity                                                        | 0.02%     | 0.81       | 0.36           |
| GO:0004631 | phosphomevalonate kinase activity                                                       | 0.02%     | 0.81       | 0.36           |
| GO:0016780 | phosphotransferase activity, for other substituted phosphate groups                     | 0.23%     | 0.79       | 0.37           |
| GO:0015109 | chromate transmembrane transporter activity                                             | 0.04%     | 0.94       | 0.37           |
| GO:0001671 | ATPase activator activity                                                               | 0.37%     | 0.98       | 0.38           |
| GO:0000155 | phosphorelay sensor kinase activity                                                     | 0.02%     | 0.78       | 0.38           |
| GO:0004594 | pantothenate kinase activity                                                            | 0.02%     | 0.81       | 0.38           |
| GO:0016303 | 1-phosphatidylinositol-3-kinase activity                                                | 0.02%     | 0.81       | 0.38           |
| GO:0008897 | holo-[acyl-carrier-protein] synthase activity                                           | 0.05%     | 0.8        | 0.38           |
| GO:0008478 | pyridoxal kinase activity                                                               | 0.03%     | 0.81       | 0.39           |
| GO:0016638 | oxidoreductase activity, acting on the CH-NH2 group of donors                           | 0.13%     | 0.81       | 0.4            |
| GO:0008409 | 5'-3' exonuclease activity                                                              | 0.27%     | 0.79       | 0.4            |
